# Supplementary material
Source: PubMed Central journal article supplement (PMC3831985)

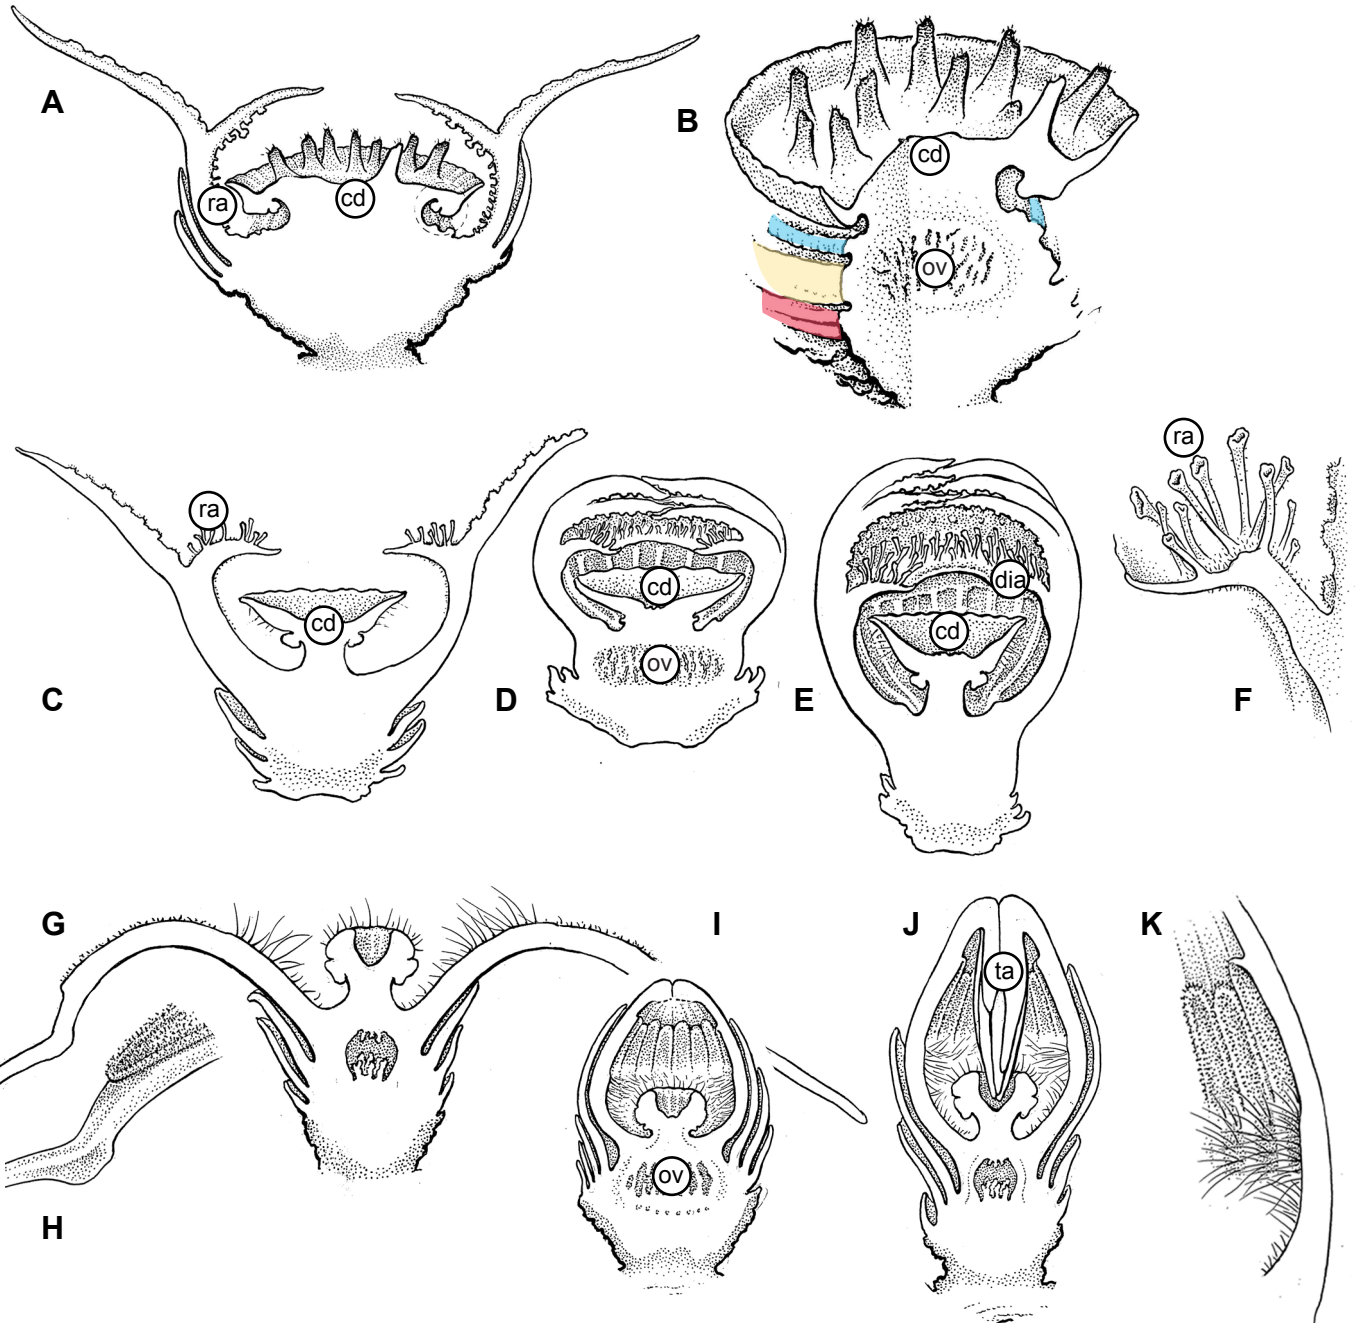

Supplement: 1310356110_sfig01.pdf [file 1310356110_sfig01.pdf]

(A)

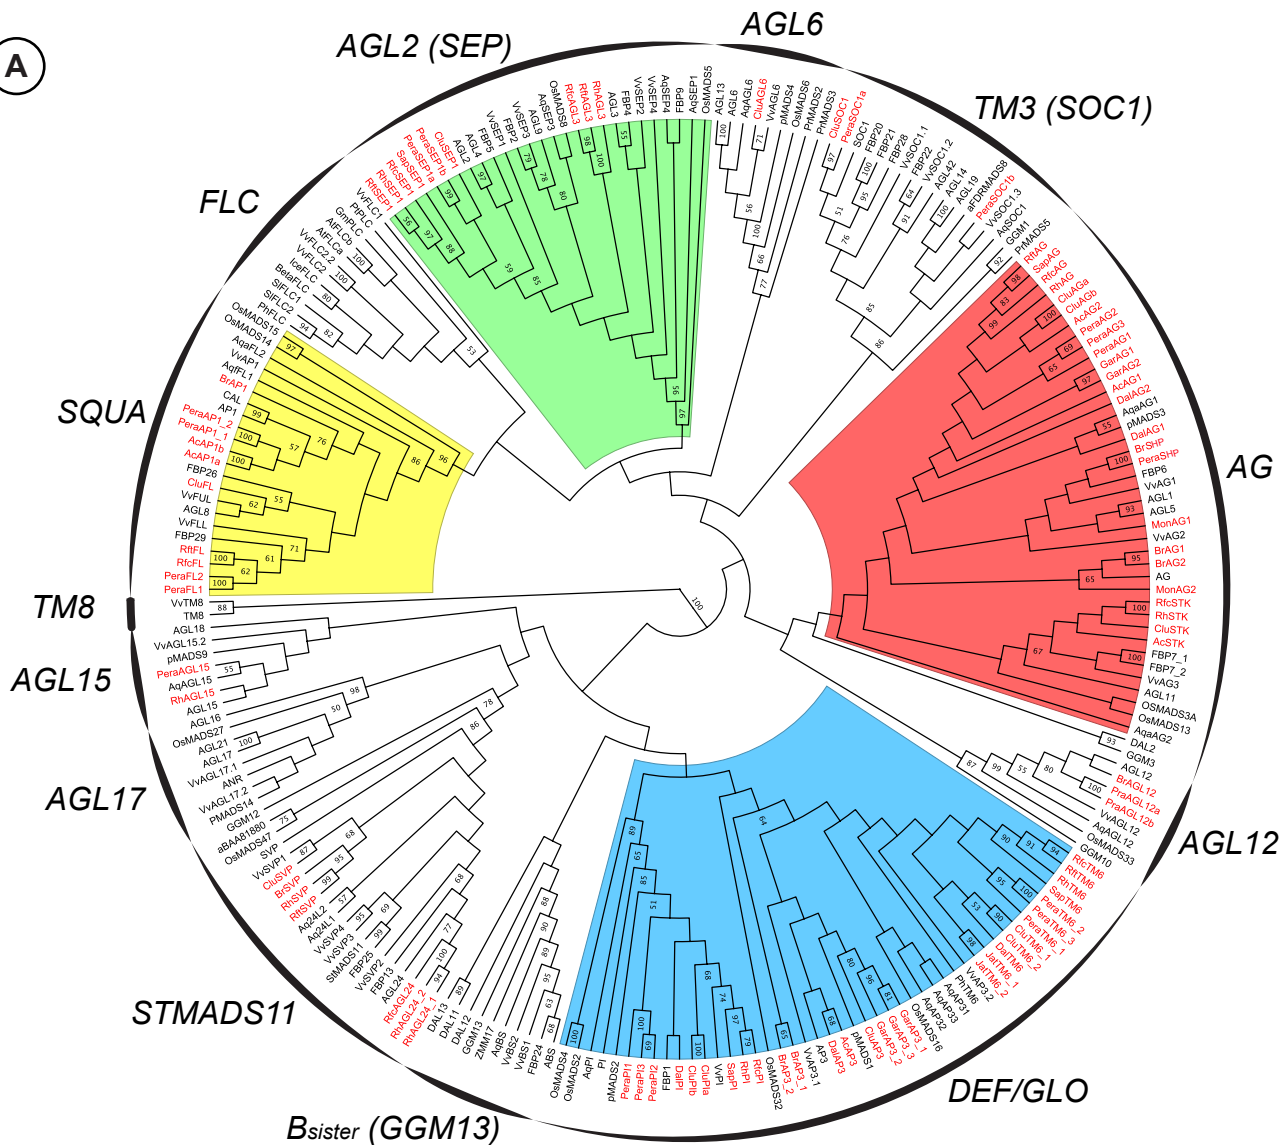

**B**

**GLOBOSA**

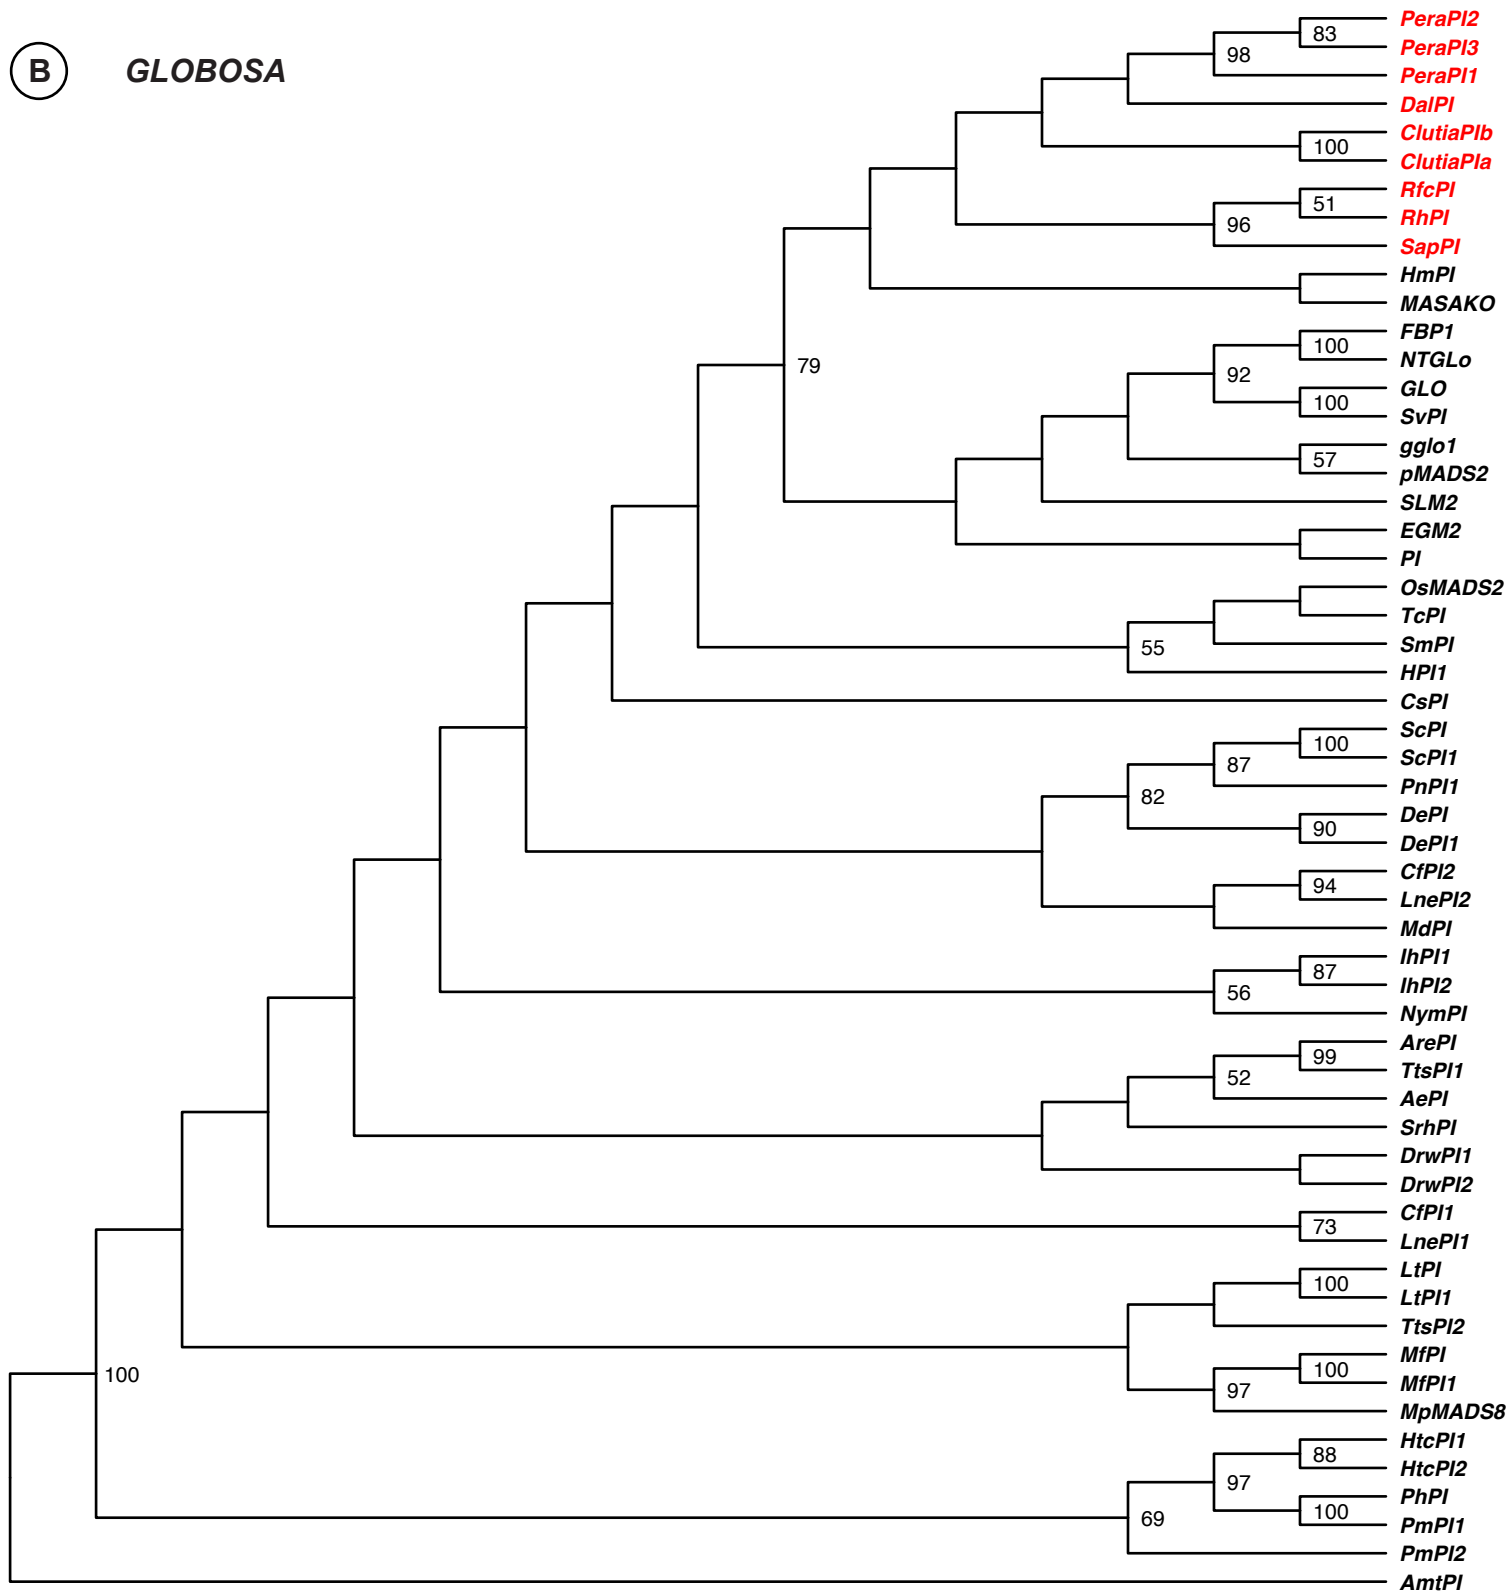

**C** DEFICIENS

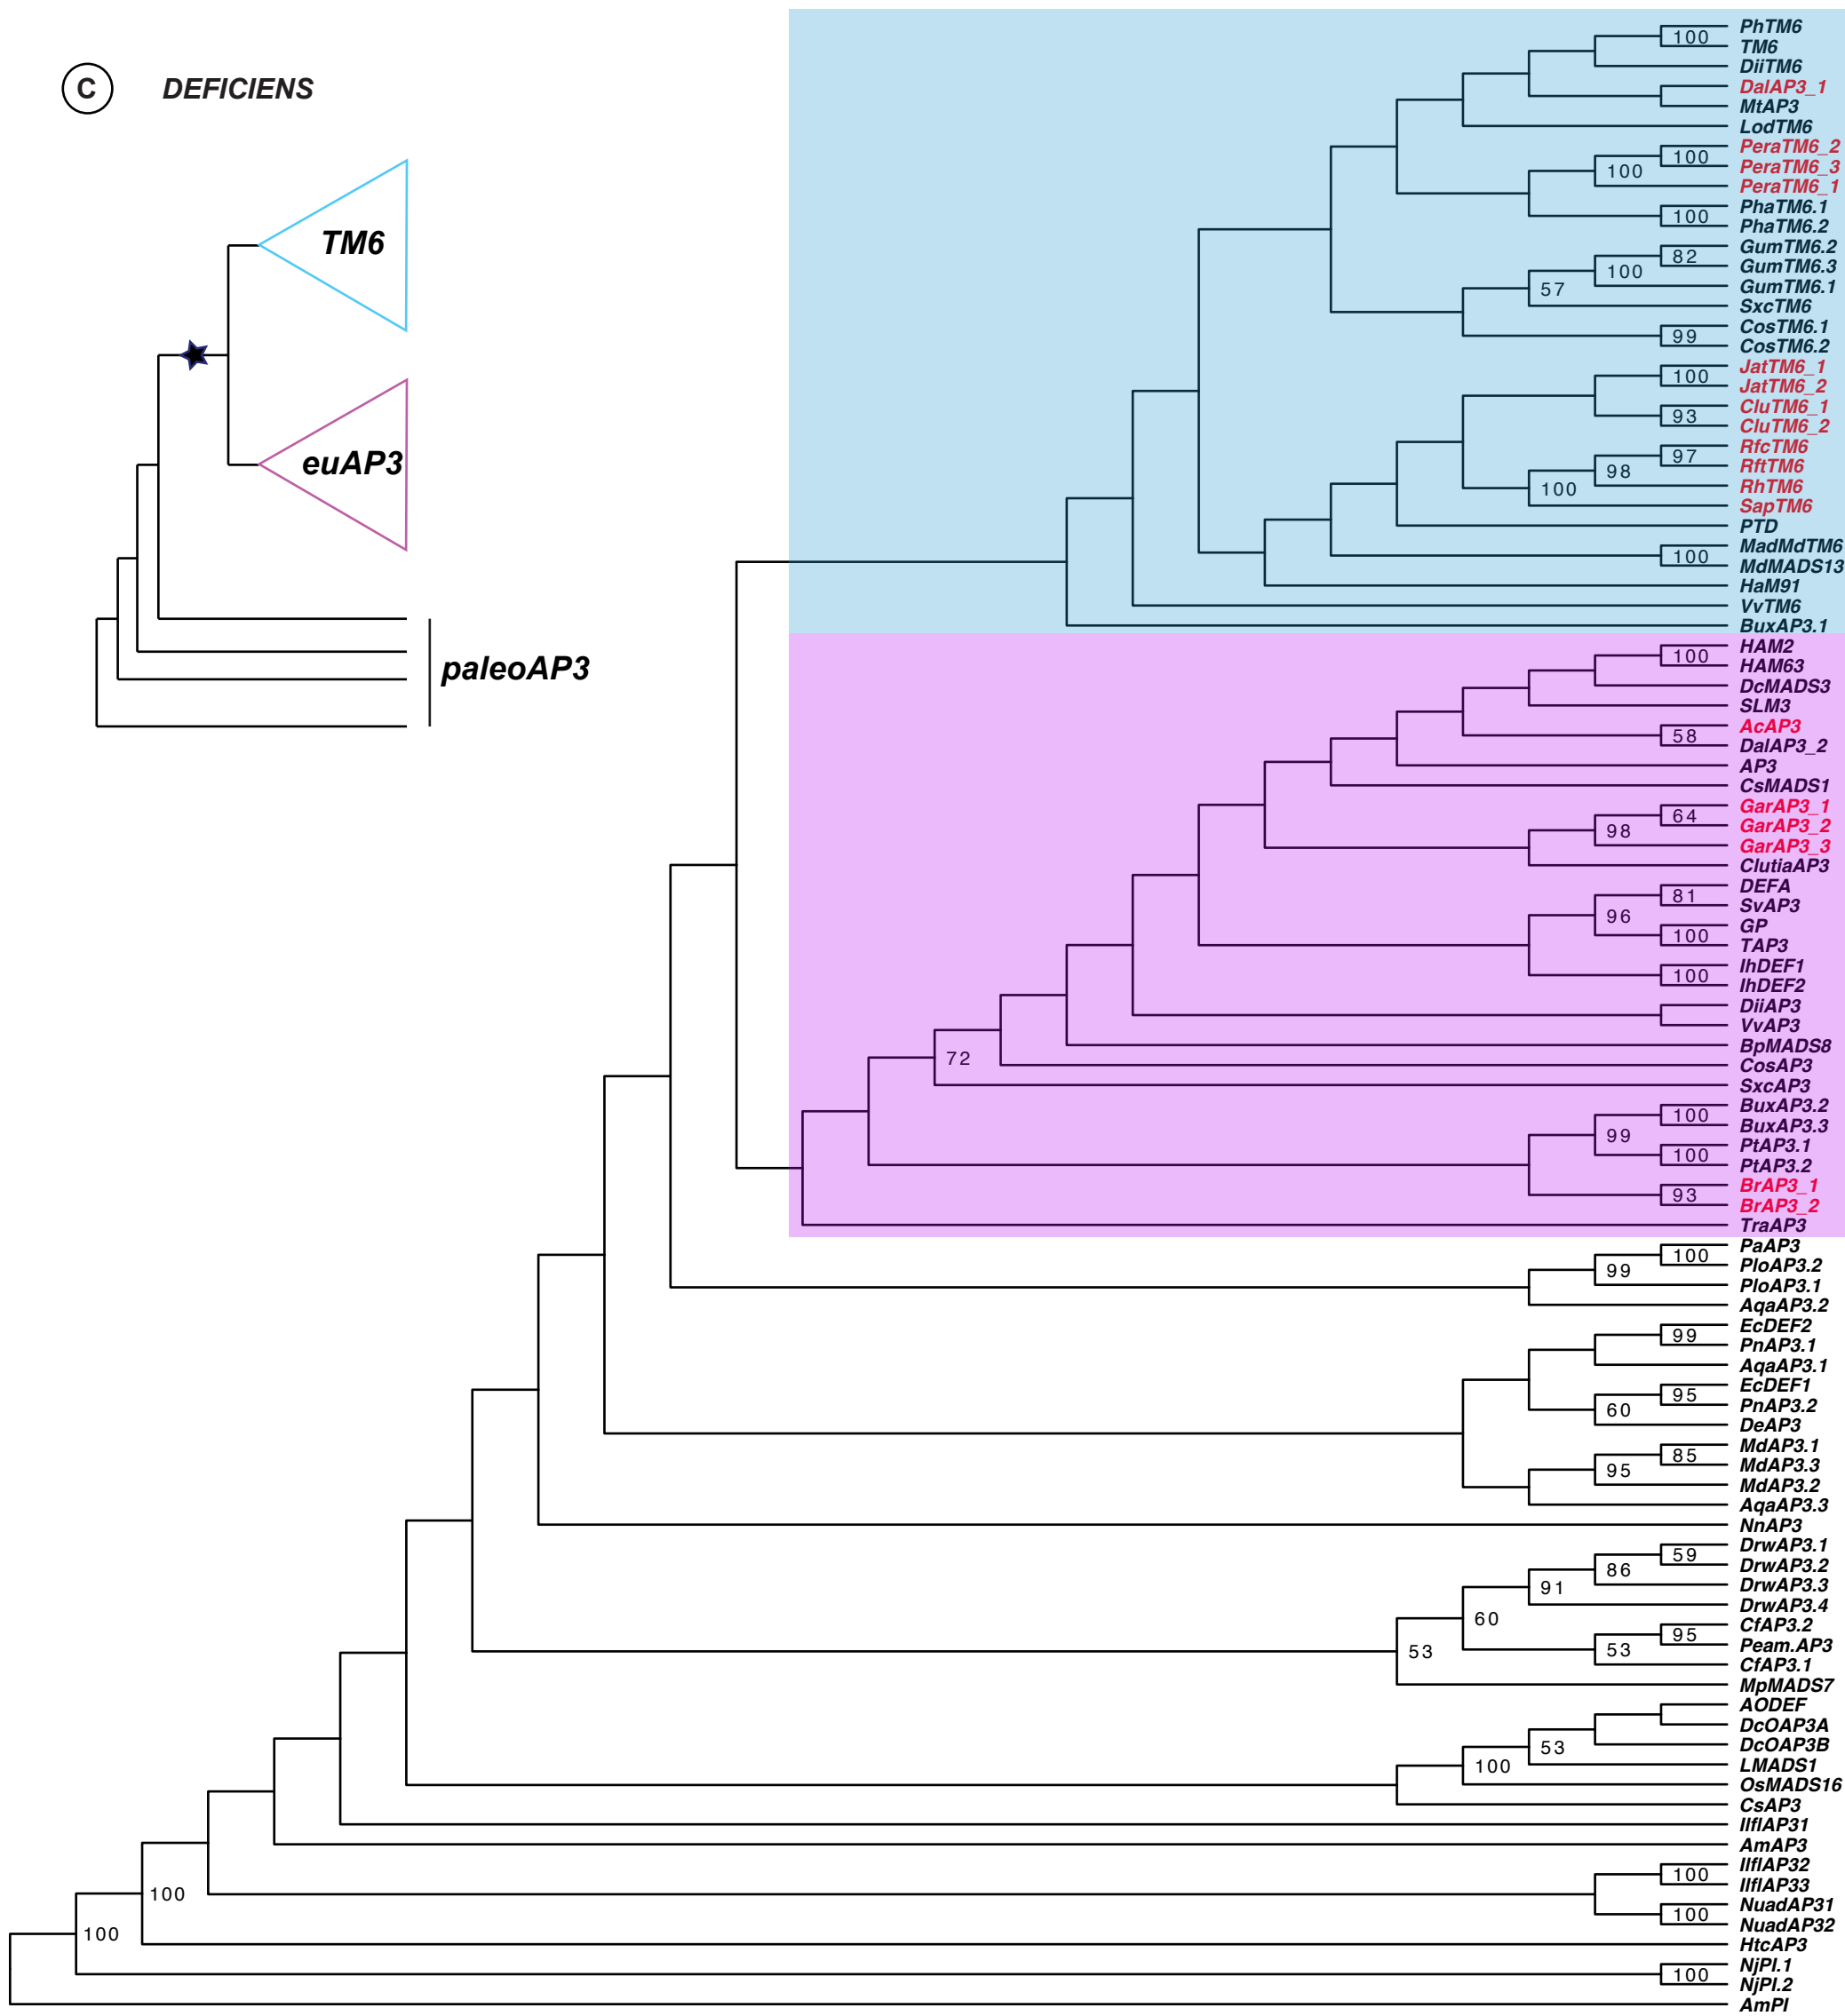



E

SQUAMOSA

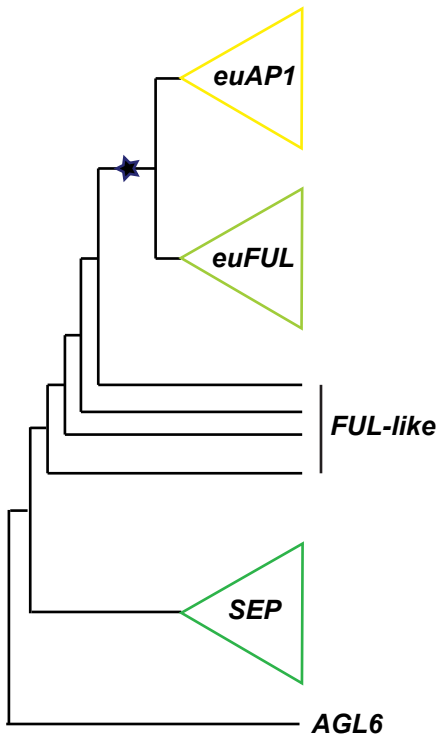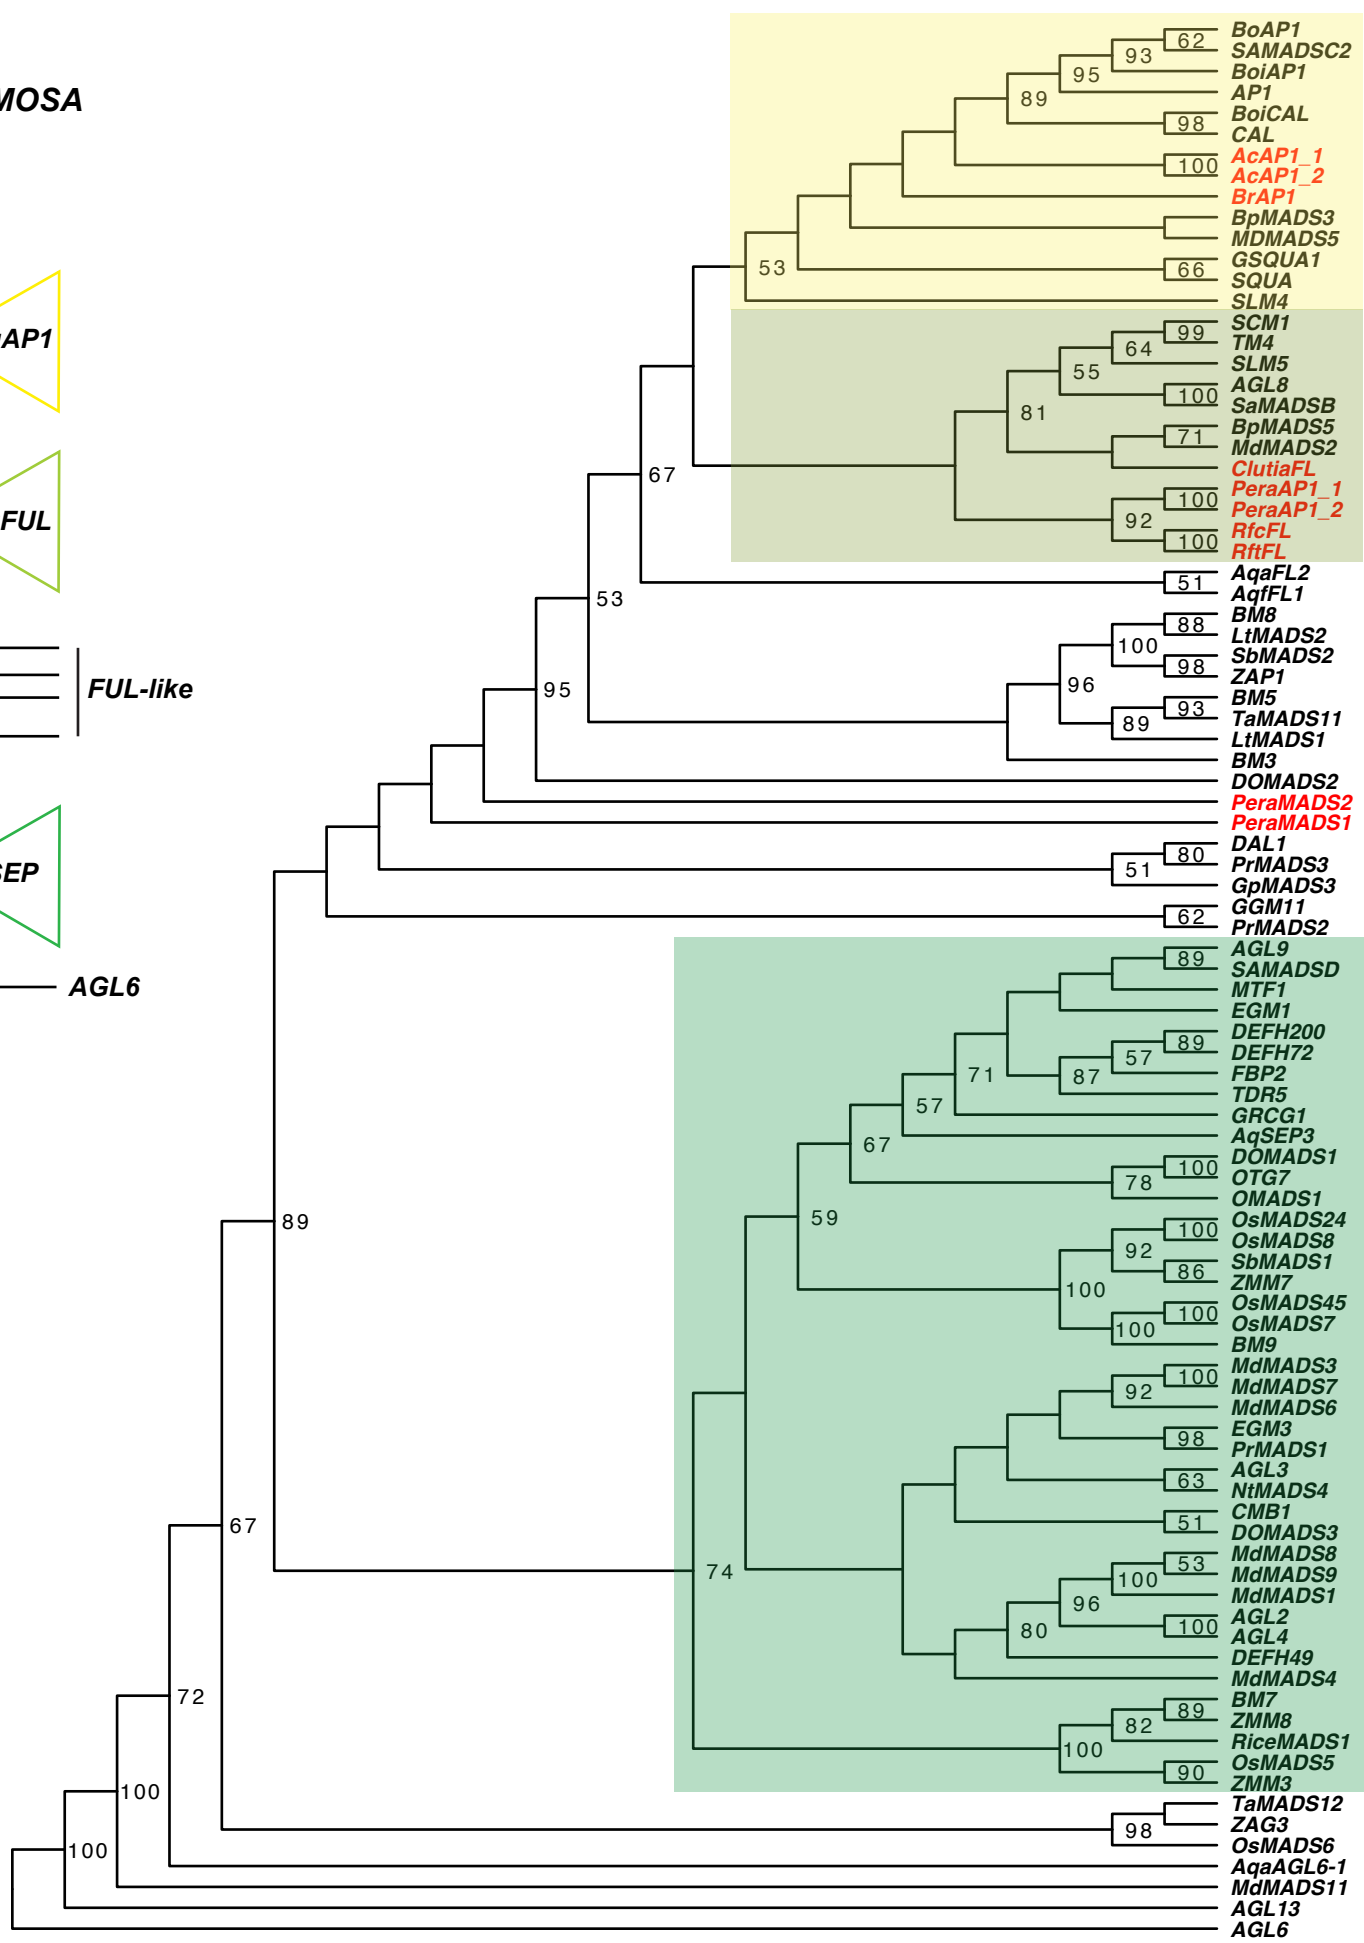

F

SEPALLATA

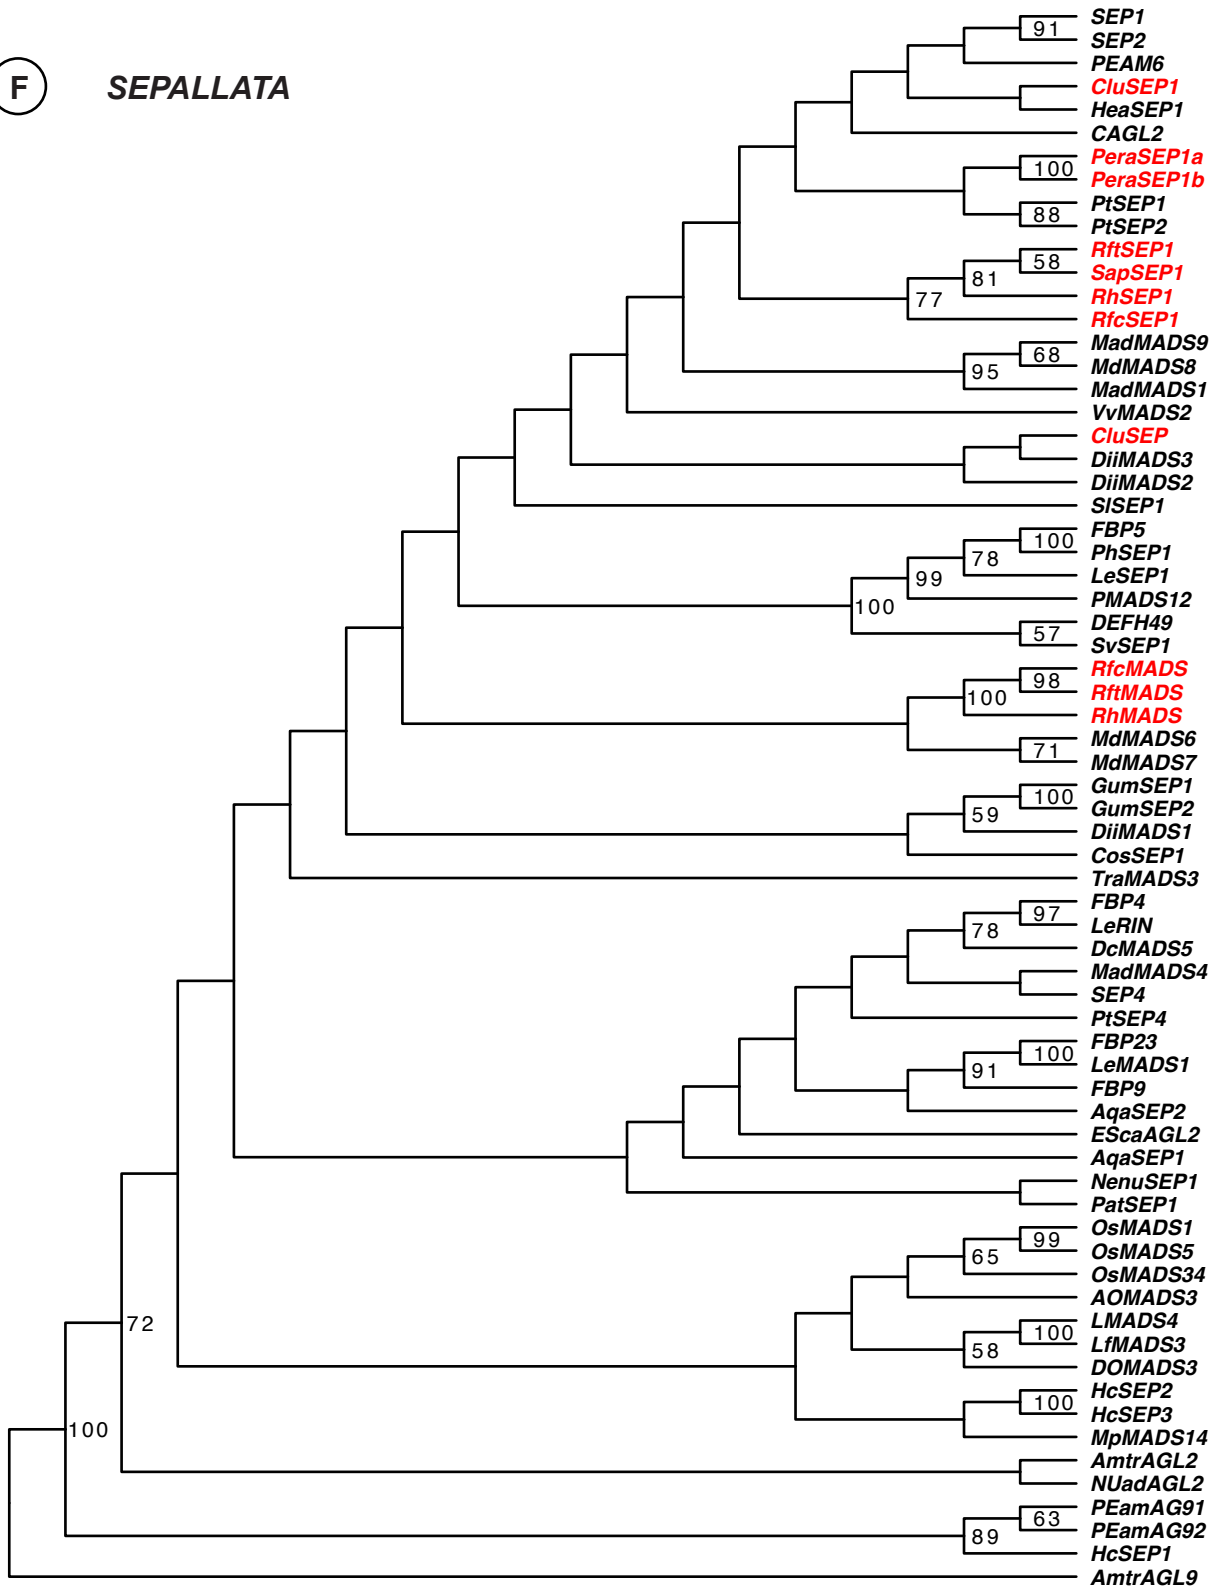

Supplement: 1310356110_sfig02.pdf [file 1310356110_sfig02.pdf]

**A** *Rafflesia*

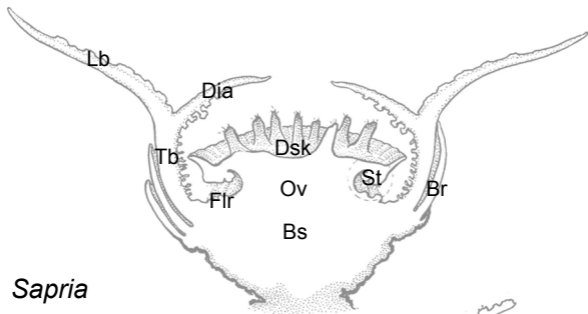

**B** *Sapria*

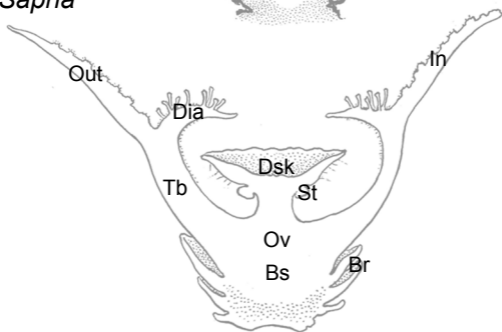

**C** *Rhizanthus*

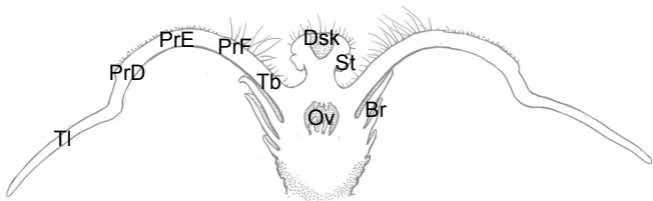

Supplement: 1310356110_sfig04.pdf [file 1310356110_sfig04.pdf]

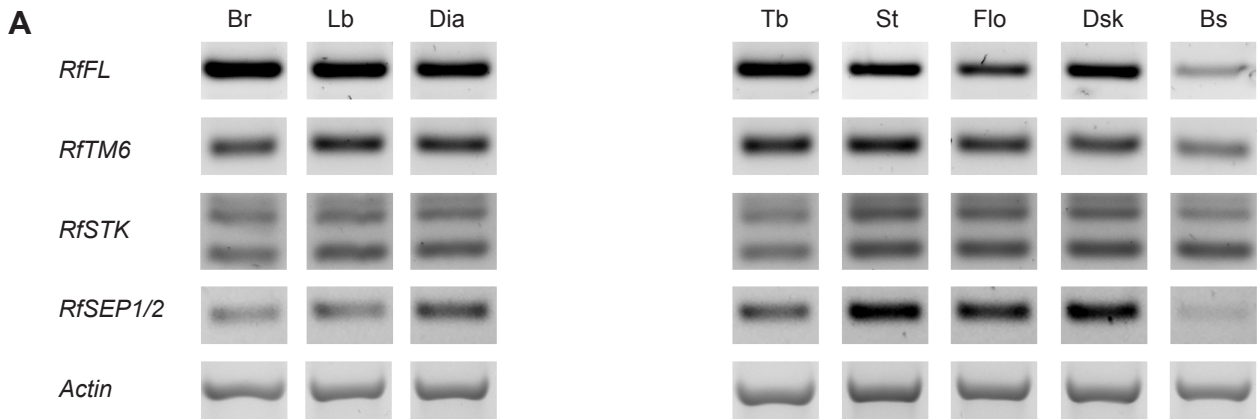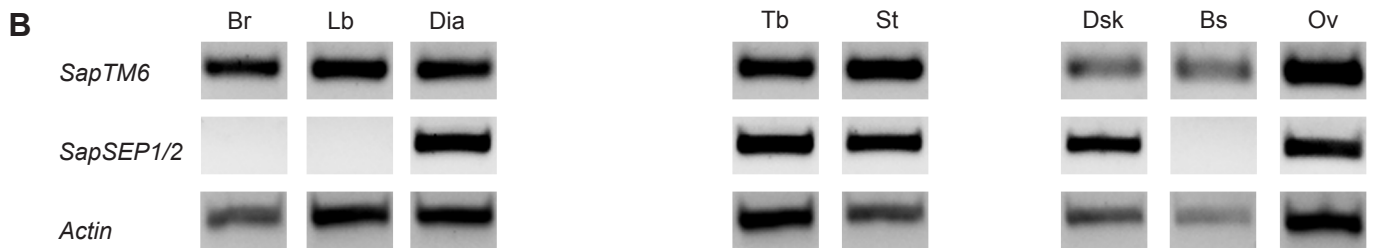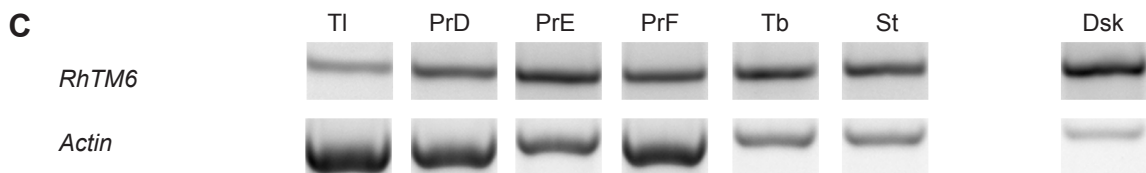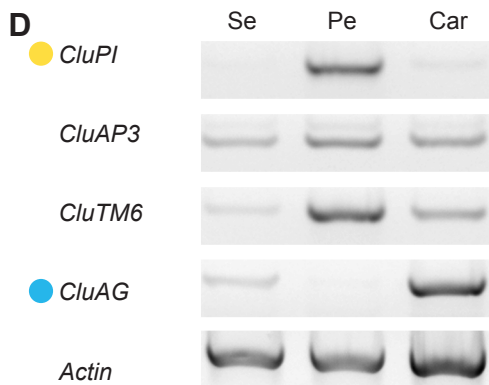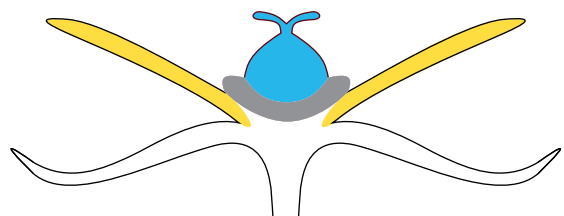

Supplement: 1310356110_sfig05.pdf [file 1310356110_sfig05.pdf]

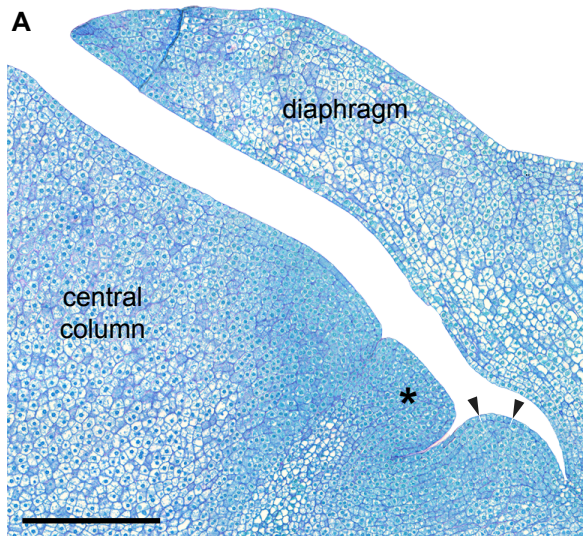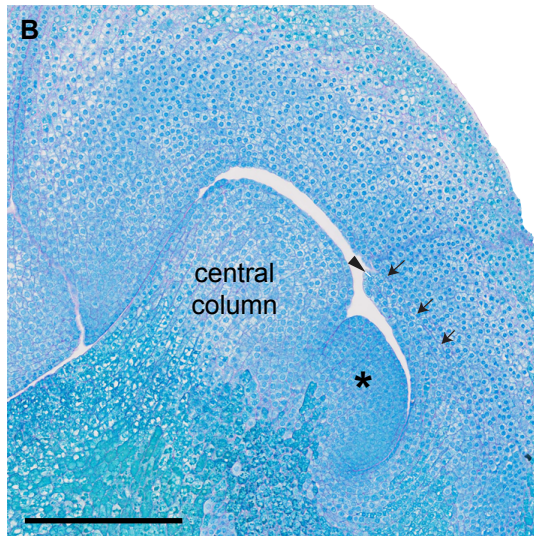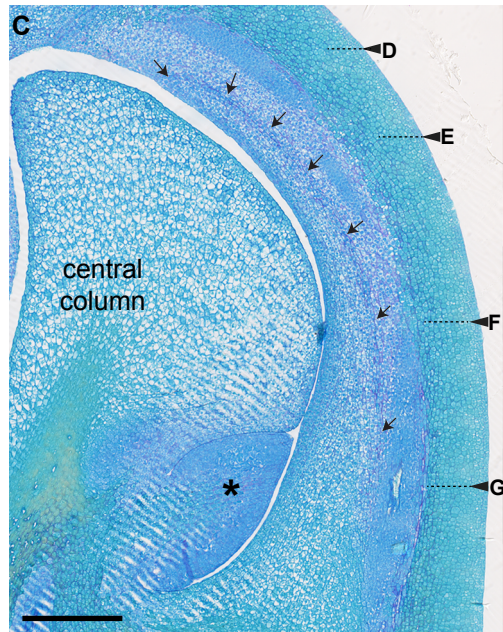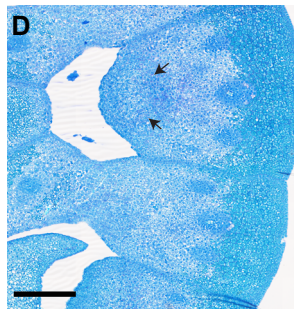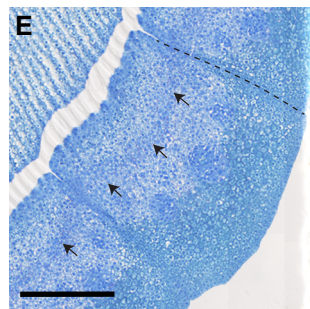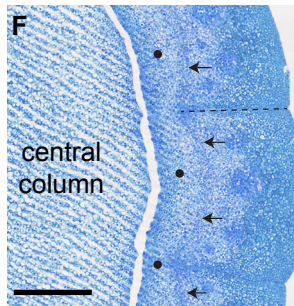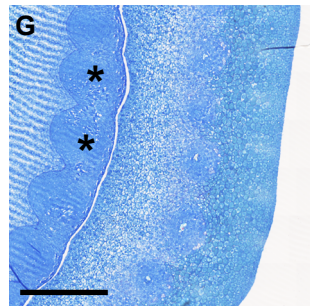

Supplement: 1310356110_sfig06.pdf [file 1310356110_sfig06.pdf]

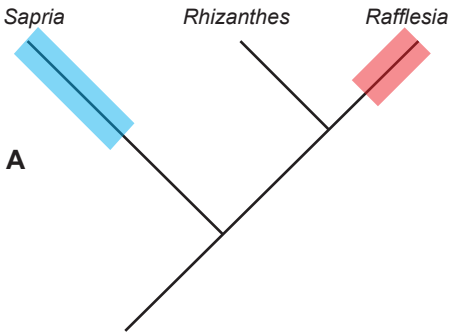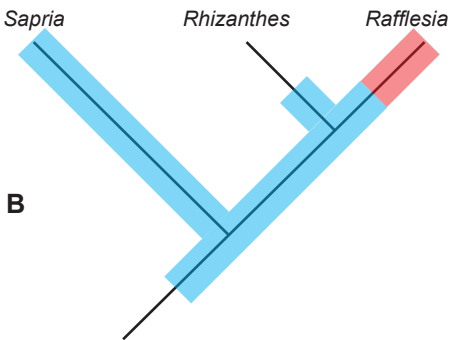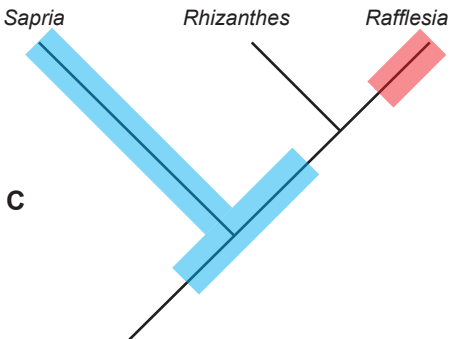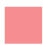

*Rafflesia*-like floral chamber

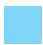

*Sapria*-like floral chamber

Supplement: 1310356110_sfig07.pdf [file 1310356110_sfig07.pdf]
